# Supplementary material for: Antimicrobial Activity of a Library of Thioxanthones and Their Potential as Efflux Pump Inhibitors
Source: MDPI journal article supplement (doi:10.3390/ph14060572), 2021-06-15
Supplement: s1 [file s1]

## Supporting Information

# Antimicrobial activity of a library of thioxanthenes and their potential as efflux pump inhibitors

**Fernando Durães <sup>1,2</sup>, Andreia Palmeira <sup>1,2</sup>, Bárbara Cruz <sup>3</sup>, Joana Freitas-Silva <sup>2,4</sup>, Nikoletta Szemerédi <sup>5</sup>, Luís Gales <sup>6,7</sup>, Paulo Martins da Costa <sup>2,4</sup>, Fernando Remião <sup>3</sup>, Renata Silva <sup>3</sup>, Madalena Pinto <sup>1,2</sup>, Gabriella Spengler <sup>5 \*</sup>, Emília Sousa <sup>1,2 \*</sup>**

<sup>1</sup> Laboratory of Organic and Pharmaceutical Chemistry, Department of Chemical Sciences, Faculty of Pharmacy, University of Porto, Rua de Jorge Viterbo Ferreira, 228, 4050-313 Porto, Portugal; fduraes5@gmail.com (F. D.); apalmeira@ff.up.pt (A.P.).

<sup>2</sup> CIIMAR-Interdisciplinary Centre of Marine and Environmental Research, University of Porto, Novo Edifício do Terminal de Cruzeiros do Porto de Leixões, Avenida General Norton de Matos, S/N, 4450-208 Matosinhos, Portugal; madalena@ff.up.pt (M.P.), joanafreitasdasilva@gmail.com (J.F.-S.).

<sup>3</sup> UCIBIO-REQUIMTE, Laboratory of Toxicology, Faculty of Pharmacy, University of Porto, Rua de Jorge Viterbo Ferreira 228, 4050-313 Porto, Portugal; up201607633@med.up.pt (B.C.); remiao@ff.up.pt (F.R.), rsilva@ff.up.pt (R.S.)

<sup>4</sup> ICBAS – Institute of Biomedical Sciences Abel Salazar, Universidade do Porto, Rua de Jorge Viterbo Ferreira 228, 4050-313 Porto, Portugal; pmcosta@icbas.up.pt (P.M.C.).

<sup>5</sup> Department of Medical Microbiology and Immunobiology, Faculty of Medicine, University of Szeged, Dóm tér 10, 6720 Szeged, Hungary; szemeredi.nikoletta@med.u-szeged.hu (N. S.).

<sup>6</sup> Department of Molecular Biology, ICBAS - Instituto de Ciências Biomédicas Abel Salazar, University of Porto, Porto, Portugal; lgales@ibmc.up.pt (L.G.).

<sup>7</sup> Bioengineering & Synthetic Microbiology, I3S – Instituto de Investigação e Inovação em Saúde, University of Porto, Porto, Portugal

\* Correspondence: spengler.gabriella@med.u-szeged.hu (G. S.); esousa@ff.up.pt (E. S.).

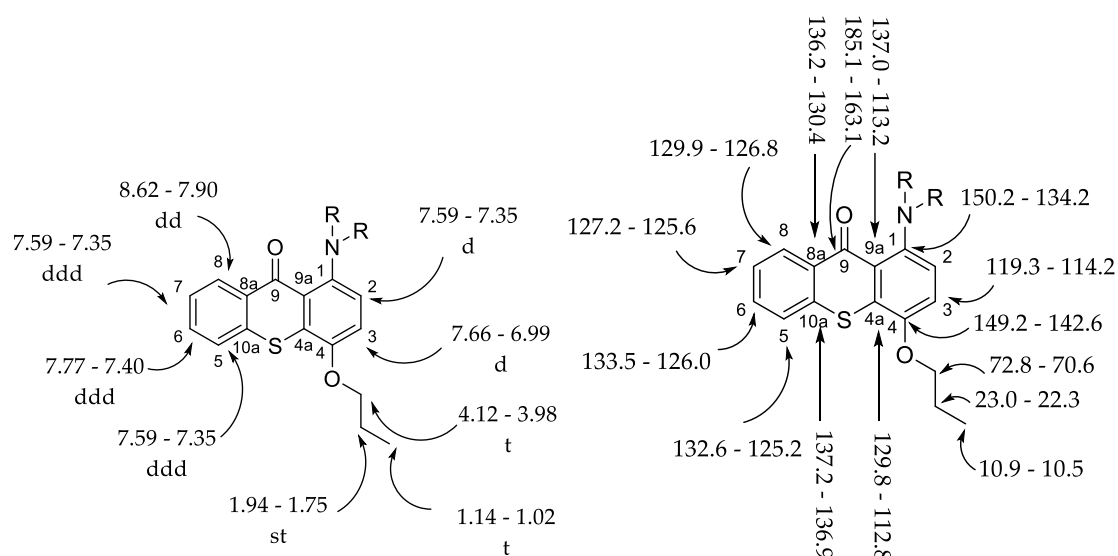

**Figure S1.** Main  $^1\text{H}$  (left) and  $^{13}\text{C}$  (right) signals for the 1-nitrogen substituted thioxanthenes **8-14**.

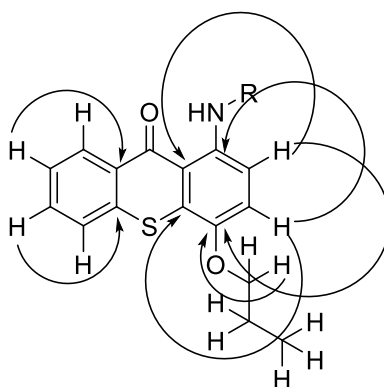

**Figure S2.** Main connectivities found in the HMBC for the thioxanthone scaffold used in this work.

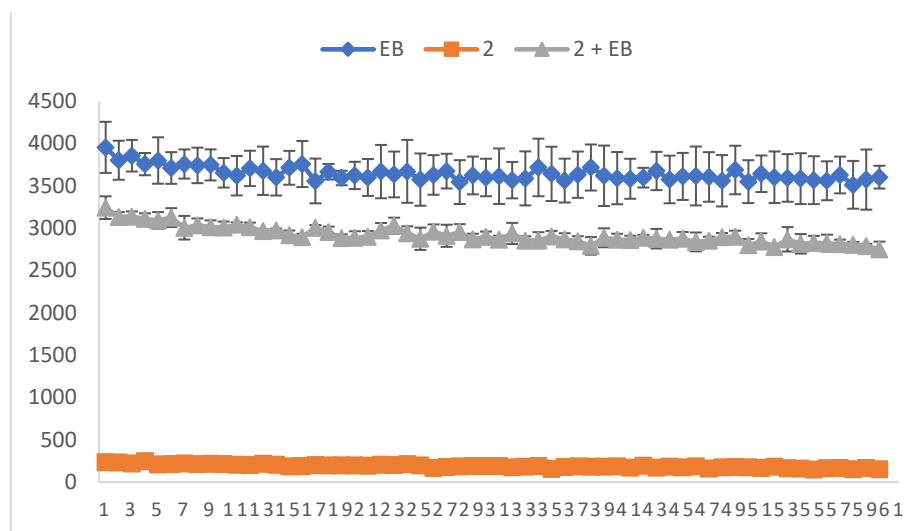

**Figure S3.** Evaluation of the fluorescence of compound **2** alone and in combination with EB.

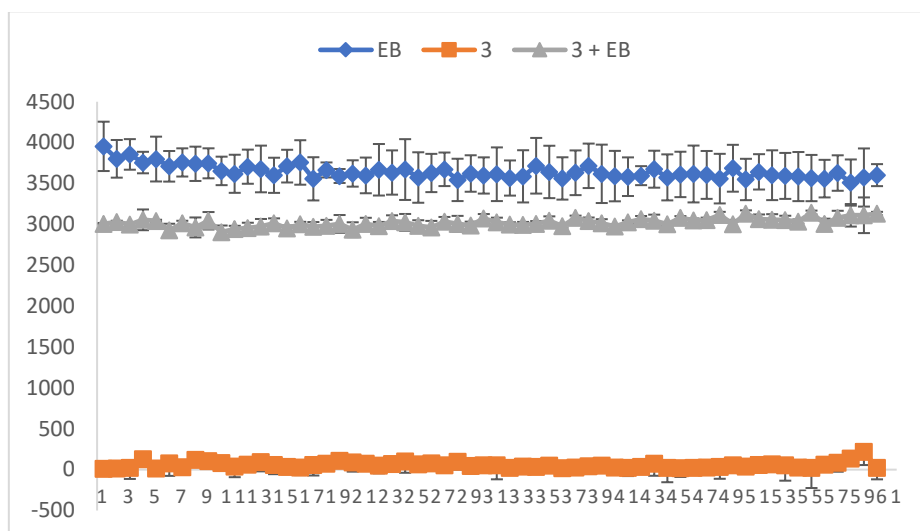

**Figure S4.** Evaluation of the fluorescence of compound **3** alone and in combination with EB.

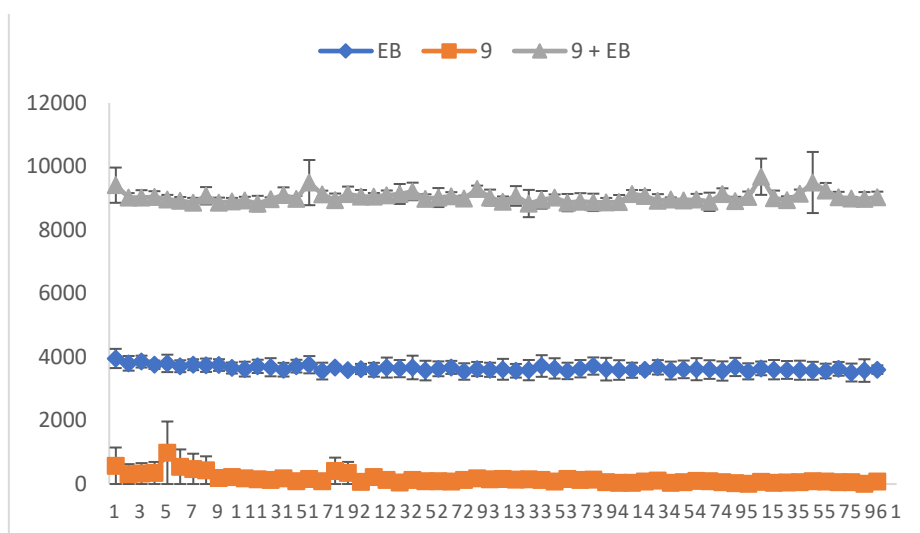

**Figure S5.** Evaluation of the fluorescence of compound **9** alone and in combination with EB.

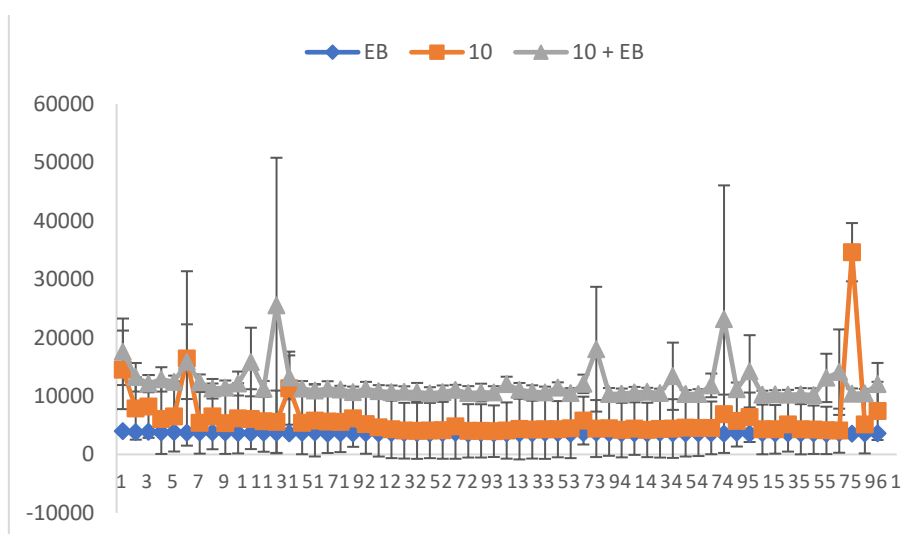

**Figure S6.** Evaluation of the fluorescence of compound **10** alone and in combination with EB.

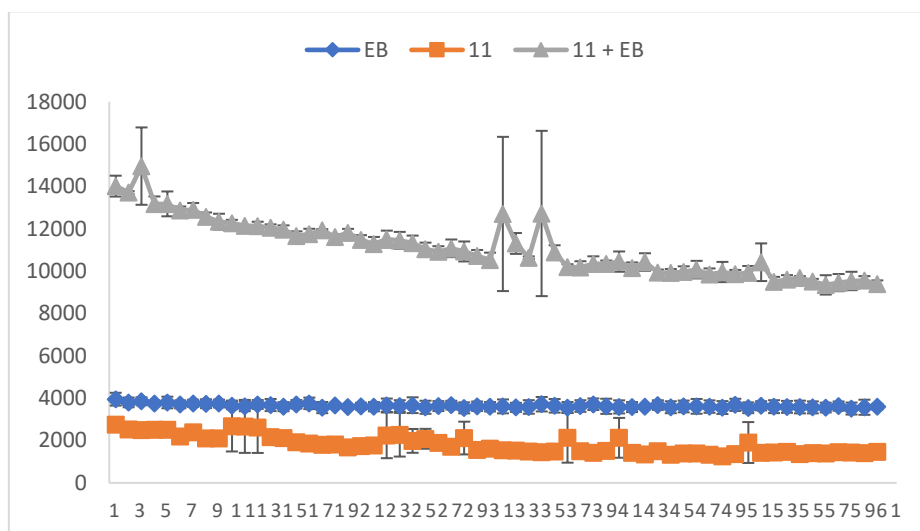

**Figure S7.** Evaluation of the fluorescence of compound **11** alone and in combination with EB.

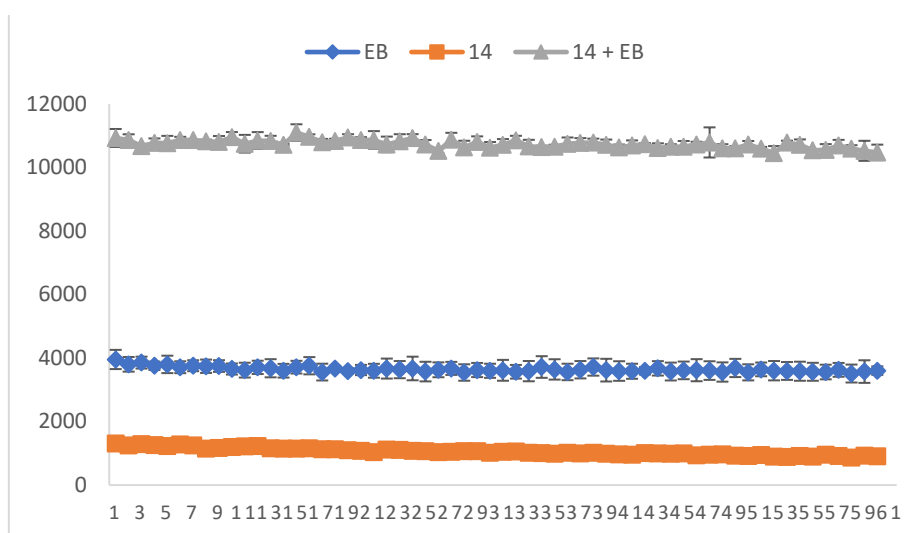

**Figure S8.** Evaluation of the fluorescence of compound **14** alone and in combination with EB.

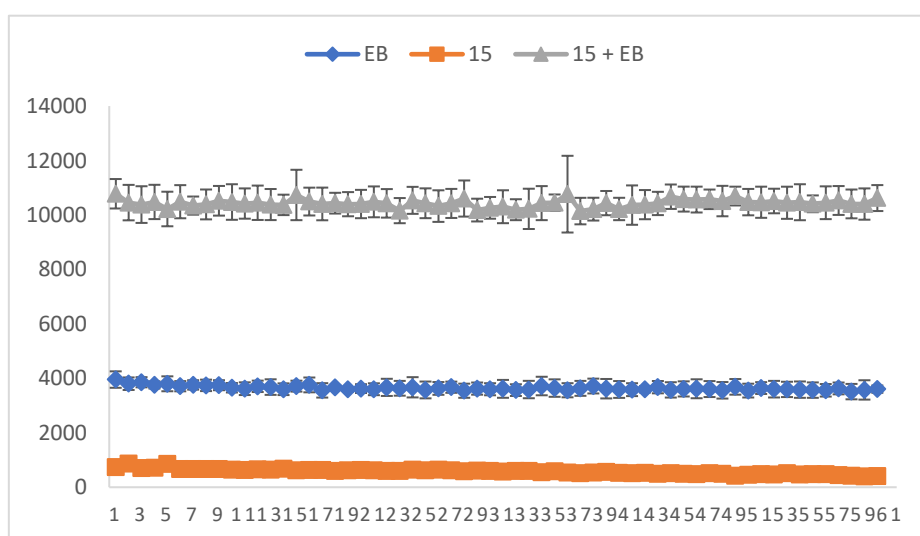

**Figure S9.** Evaluation of the fluorescence of compound **15** alone and in combination with EB.

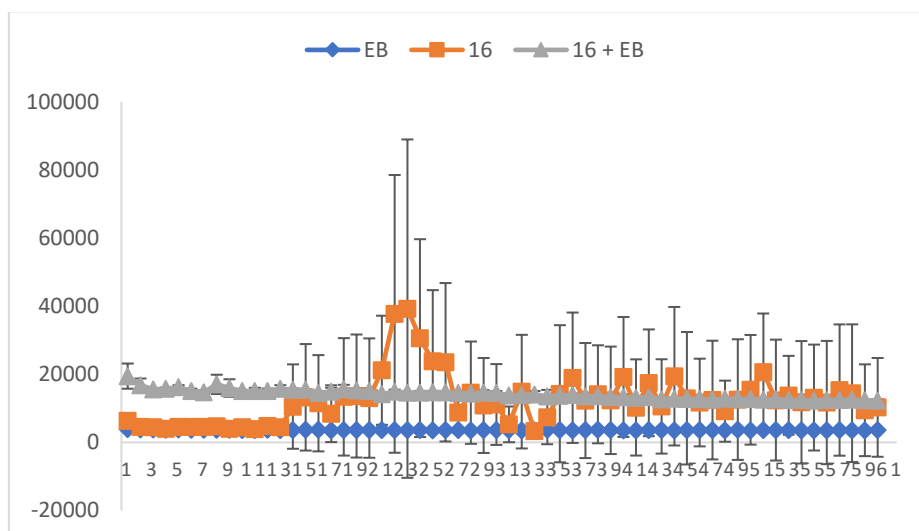

**Figure S10.** Evaluation of the fluorescence of compound **16** alone and in combination with EB.

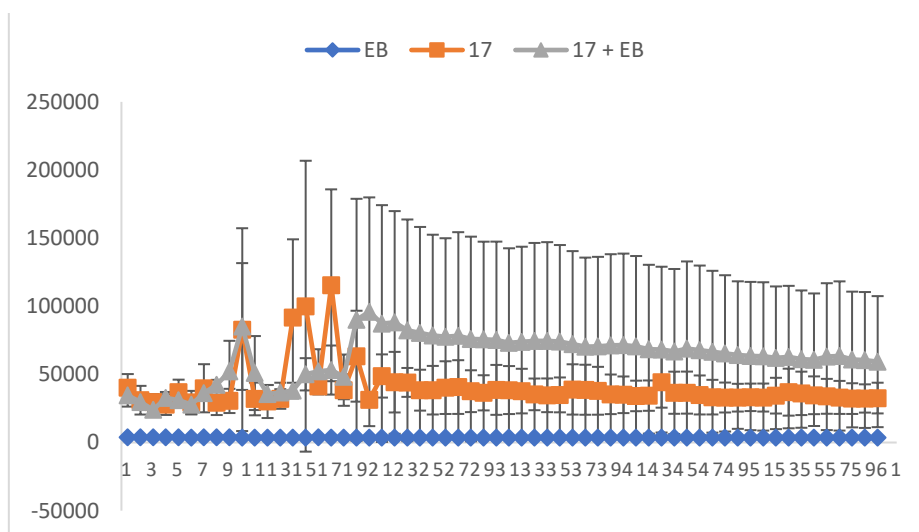

**Figure S11.** Evaluation of the fluorescence of compound **17** alone and in combination with EB.

#### **Molecular visualization of compounds **3**, **7**, **8**, and **13** into the substrate-binding site of AcrB:**

Compounds **3**, **7**, **8** and **13** were visualized in the SBS of AcrB. As it can be seen in **Figure 4, D**, the compounds are predicted to bind in the approximate site, but it is suggested that they interact with different residues. This is clarified when the compounds are analyzed individually.

Compound **3** (**Figure S11, A**) is predicted to only interact with Arg-620, through a hydrogen bond between the oxygen in the propoxy chain and a nitrogen in this residue. While it is true that all the compounds present the propoxy chain, it is also noteworthy that compound **3** has the simplest and most flexible substituent out of all this group of compounds, which can possibly allow it to get to this site within the SBS.

Compound **7** (**Figure S12, B and C**), hydrogen bonds can be seen between the carbonyl in C-9 and Gln-176, the oxygen in the propoxy chain in C-4 and Asn-274, and between the ketone of the substituent in C-1 and Gln-89.

For compound **8** (**Figure S12, D and E**), it can be noted that the nitrogens within the pyrimidine moiety form dipole interactions with Gln-89 and Gln-176, and the carbonyl in C-9 of the thioxanthone moiety forms a hydrogen bond with the amine of Gln-89. Additionally, there is a T-shaped  $\pi$ - $\pi$  interaction between the pyrimidine substituent and Phe-615.

Lastly, for compound **13** (**Figure S12, F and G**), many different hydrogen interactions can be seen. The oxygen in the propoxy chain interacts with Gln-89, like **7** and **8**. The oxygens in the sulfamide interact with Thr-87 and Arg-620, and the amine directly bonded to the aromatic ring

in the substituent can also interact with Ser-46. The carbonyl in C-9 can also interact with a water molecule, that can show hydrogen interactions with Gln-176 and Leu-177.

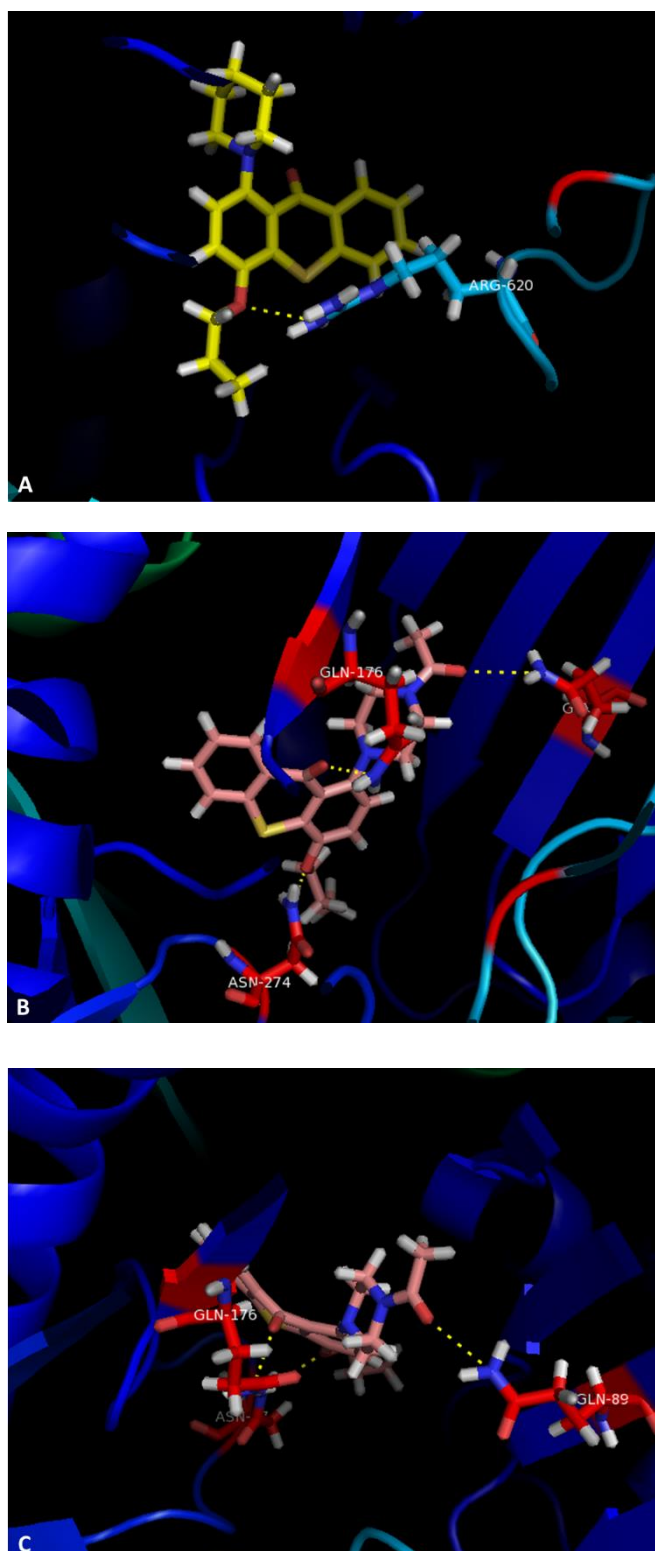

**Figure S12.** Molecular visualization in the SBS of AcrB. (A) Interaction between compound **3** and the SBS; (B) and (C) Different perspectives of the interactions between compound **7** and the SBS; (D) and (E) Different perspectives of the interactions between compound **8** and the SBS; (G) and (H) Different perspectives of the interactions between **13** and the SBS.

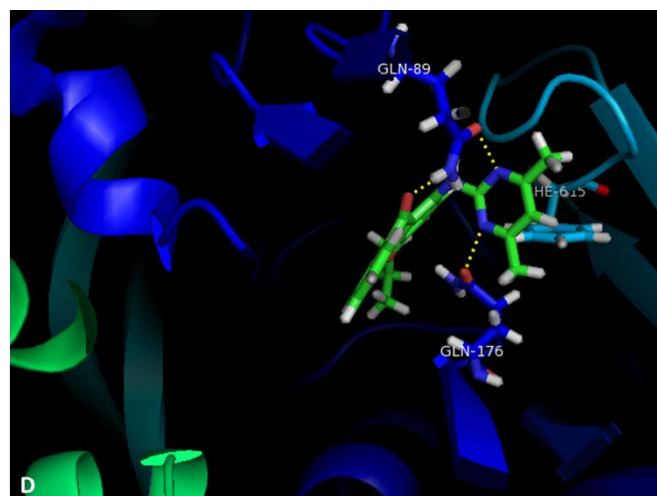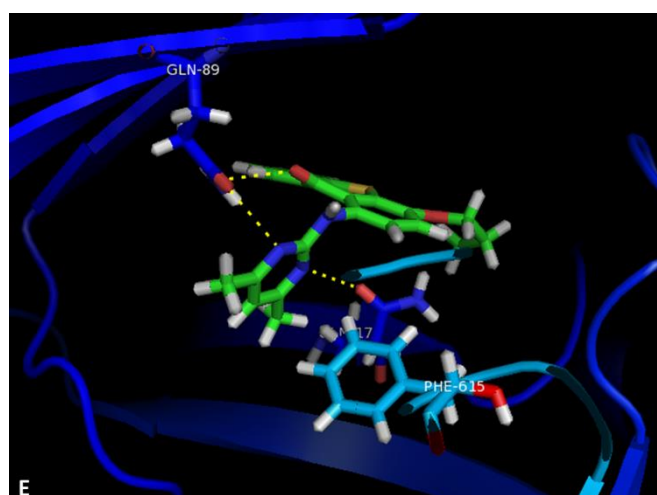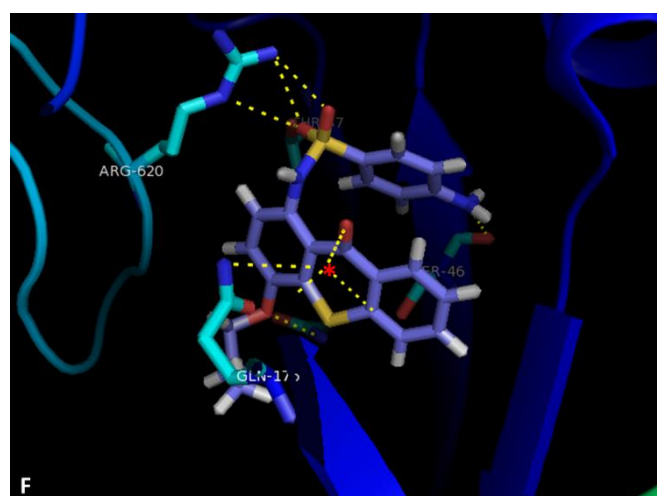

Figure S12. (cont'd)

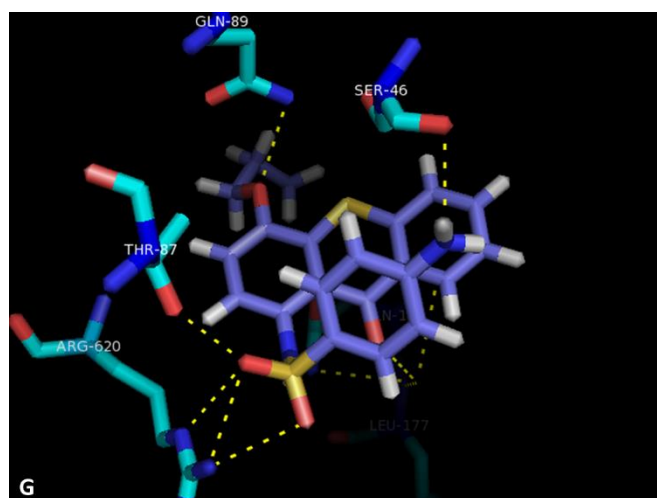

Figure S12. (cont'd)



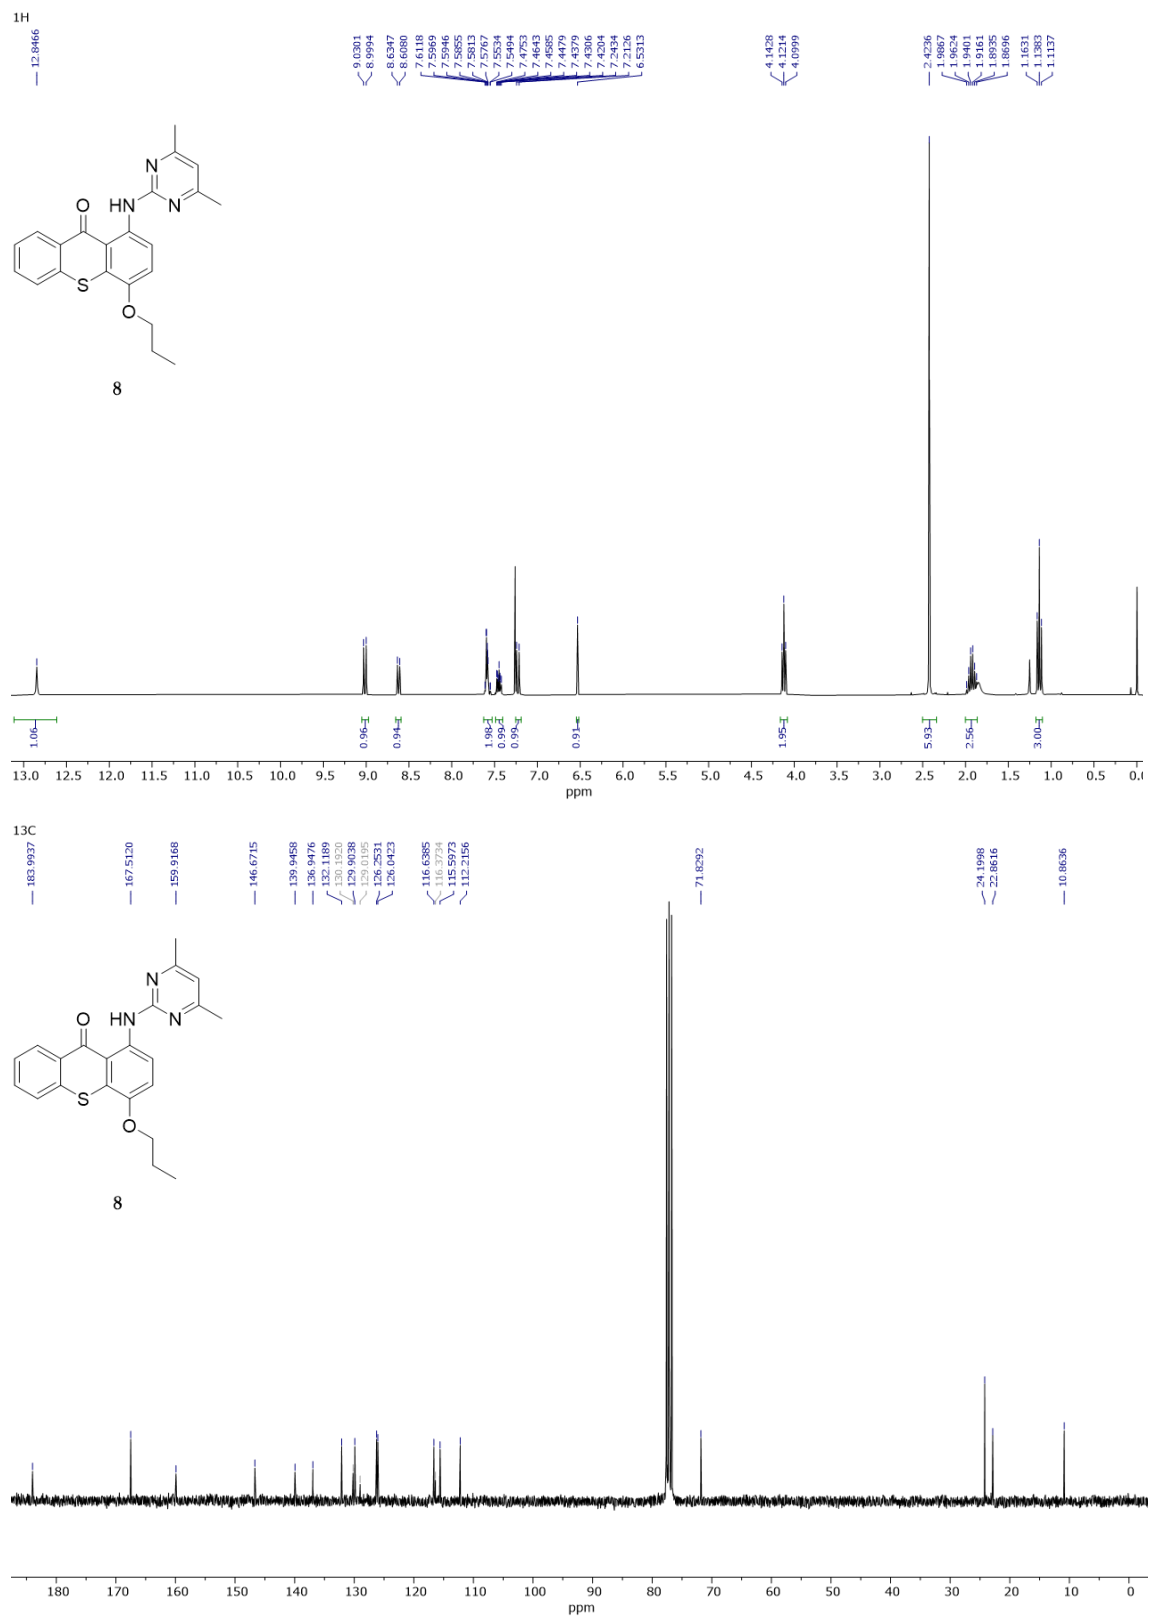

**Figure S13.** <sup>1</sup>H NMR (top, 300.13 MHz, CDCl<sub>3</sub>) and <sup>13</sup>C NMR (bottom, 75.48 MHz, CDCl<sub>3</sub>) for compound **8**.

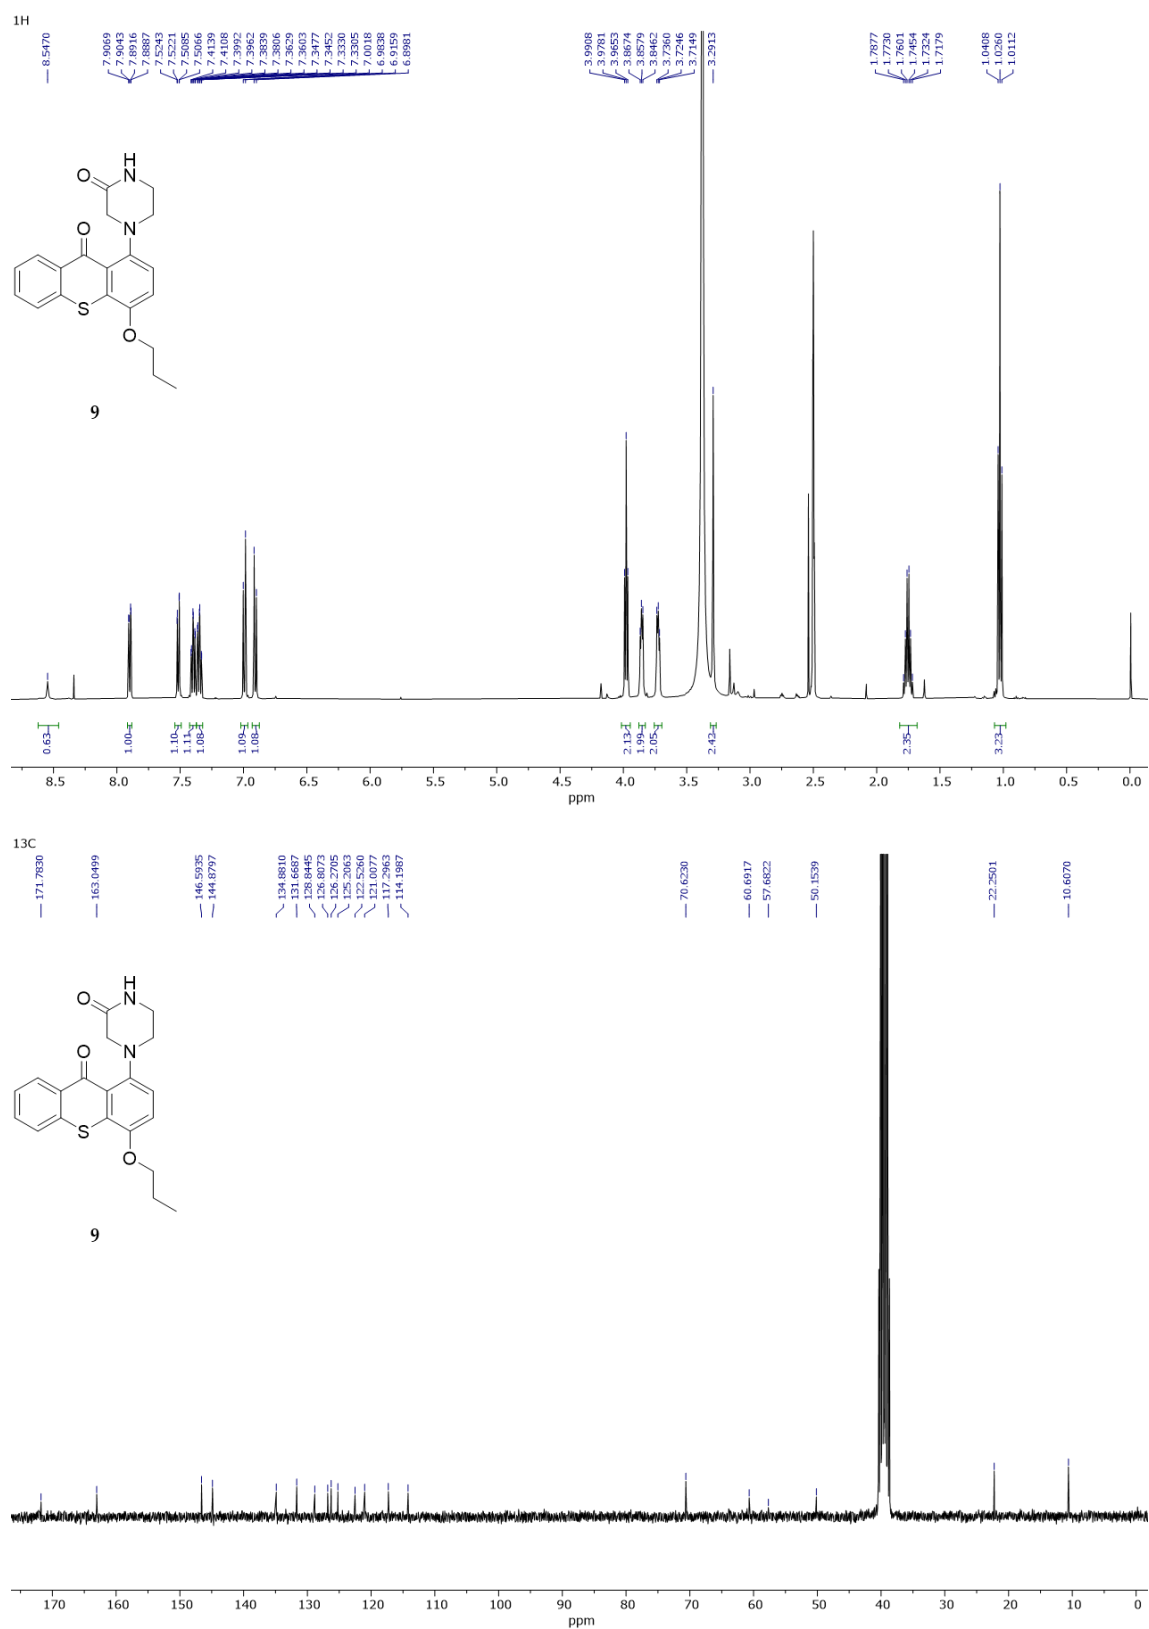

**Figure S14.** <sup>1</sup>H NMR (top, 500.13 MHz, DMSO) and <sup>13</sup>C NMR (bottom, 75.48 MHz, DMSO) for compound 9.

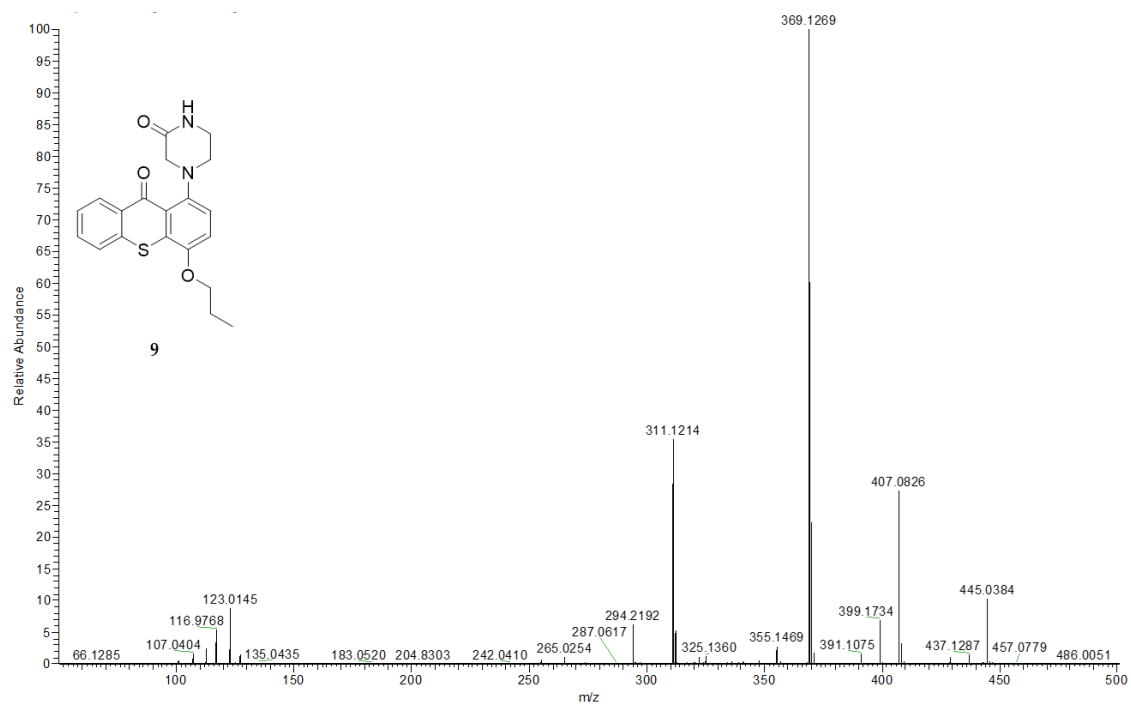

| Meas. m/z | Formula                                                         | m/z      | err [ppm] |
|-----------|-----------------------------------------------------------------|----------|-----------|
| 369.1269  | C <sub>20</sub> H <sub>21</sub> N <sub>2</sub> O <sub>3</sub> S | 369.1273 | -1.08     |

Figure S15. Electrospray ESI data for compound 9.

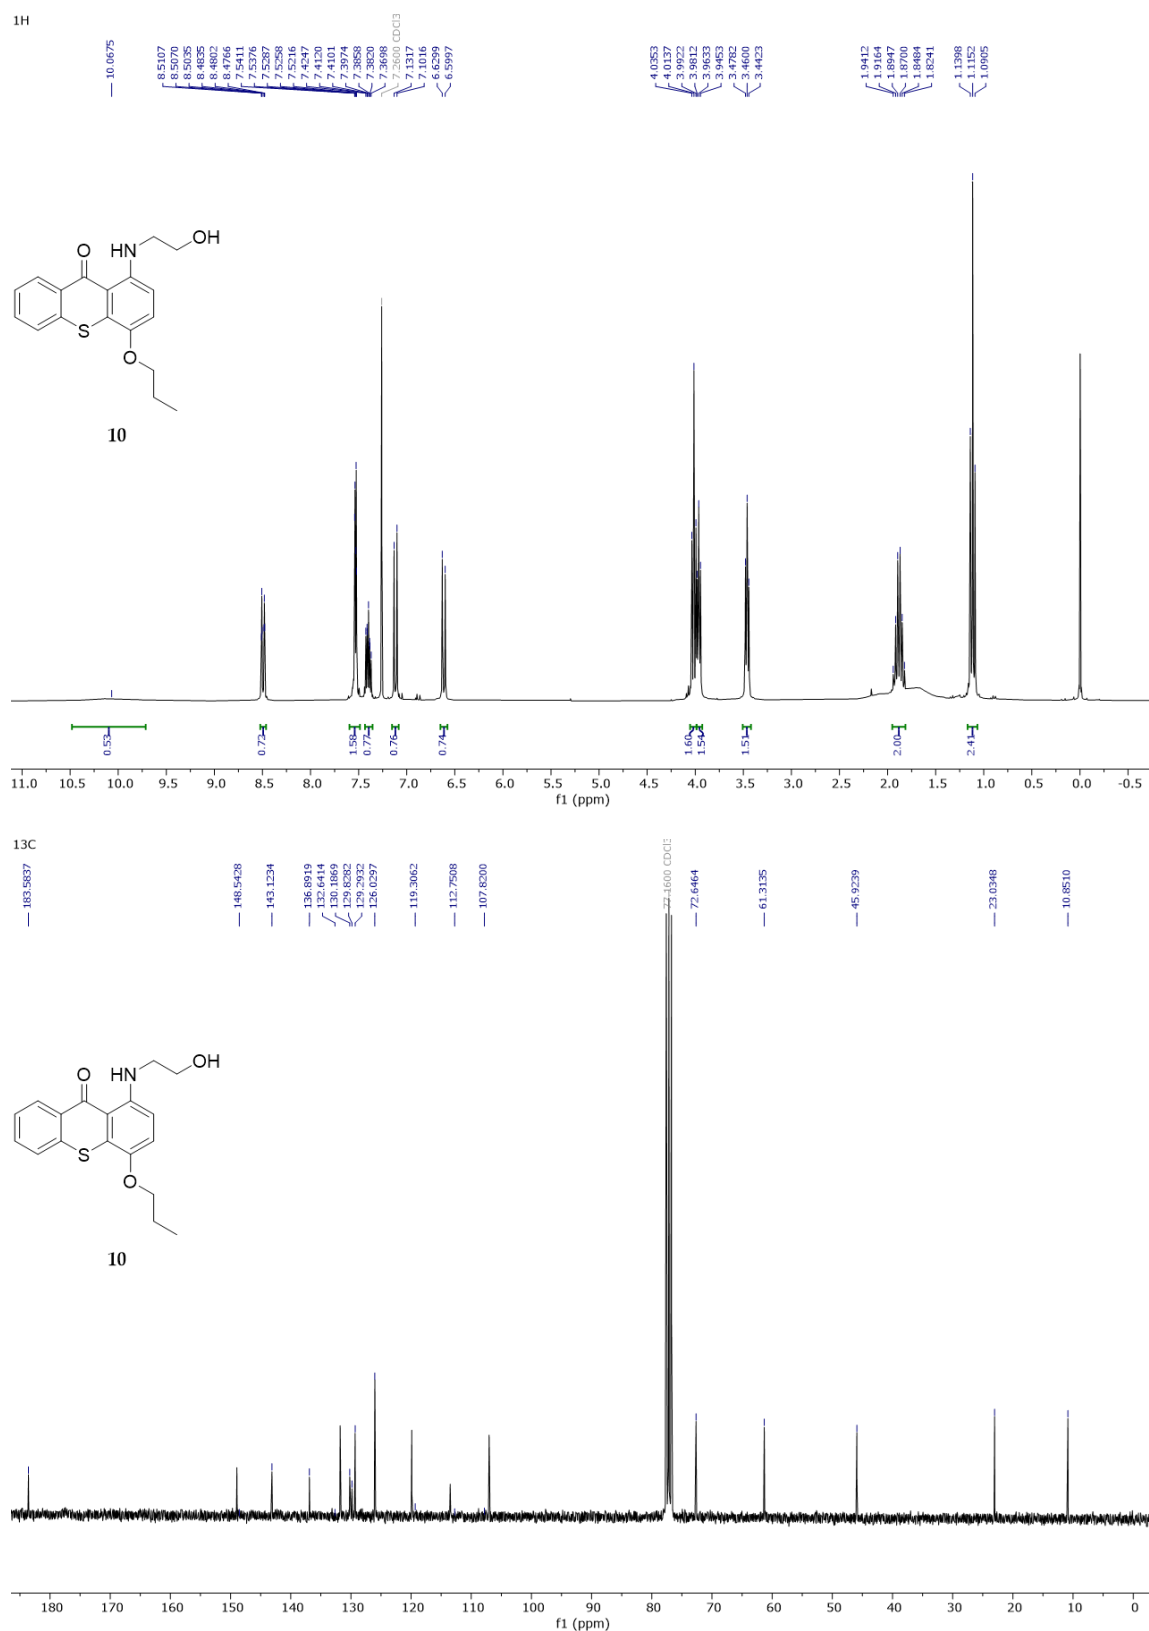

**Figure S16.** <sup>1</sup>H NMR (top, 300.13 MHz, CDCl<sub>3</sub>) and <sup>13</sup>C NMR (bottom, 75.48 MHz, CDCl<sub>3</sub>) for compound 10.

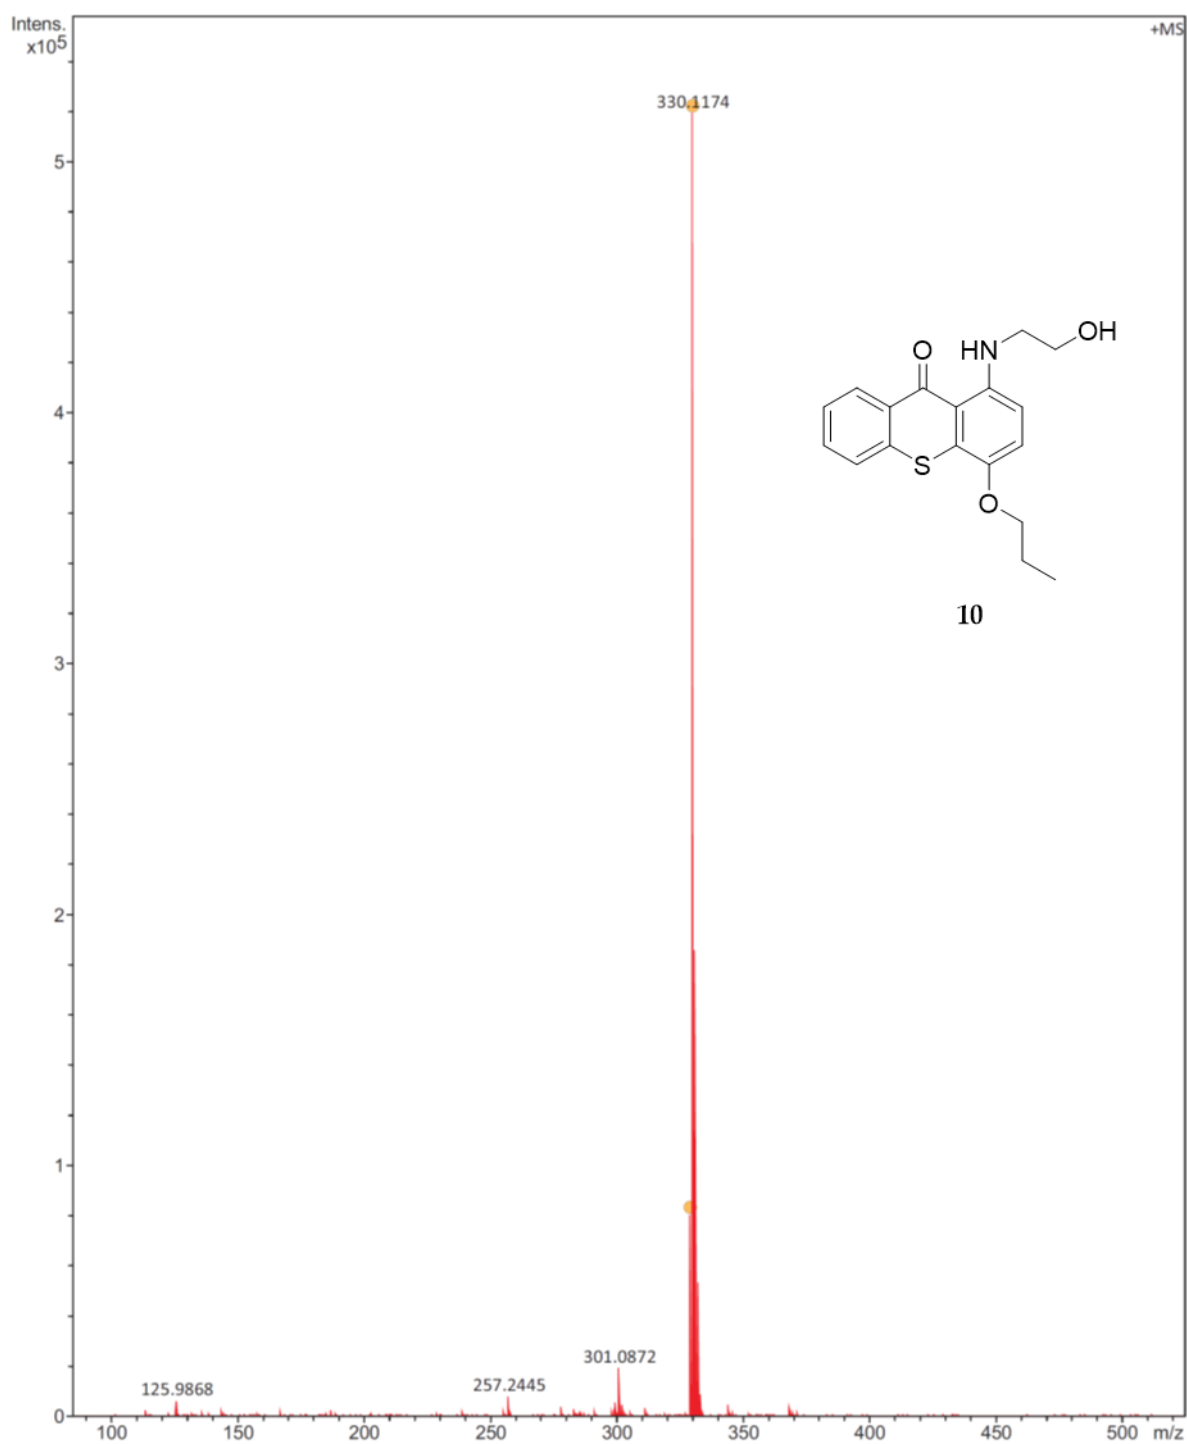

| Meas. m/z | Formula                                           | m/z       | err [ppm] |
|-----------|---------------------------------------------------|-----------|-----------|
| 329.1066  | C <sub>18</sub> H <sub>19</sub> NO <sub>3</sub> S | 329.10866 | 4.40      |

**Figure S17.** Electrospray ESI data for compound 10.

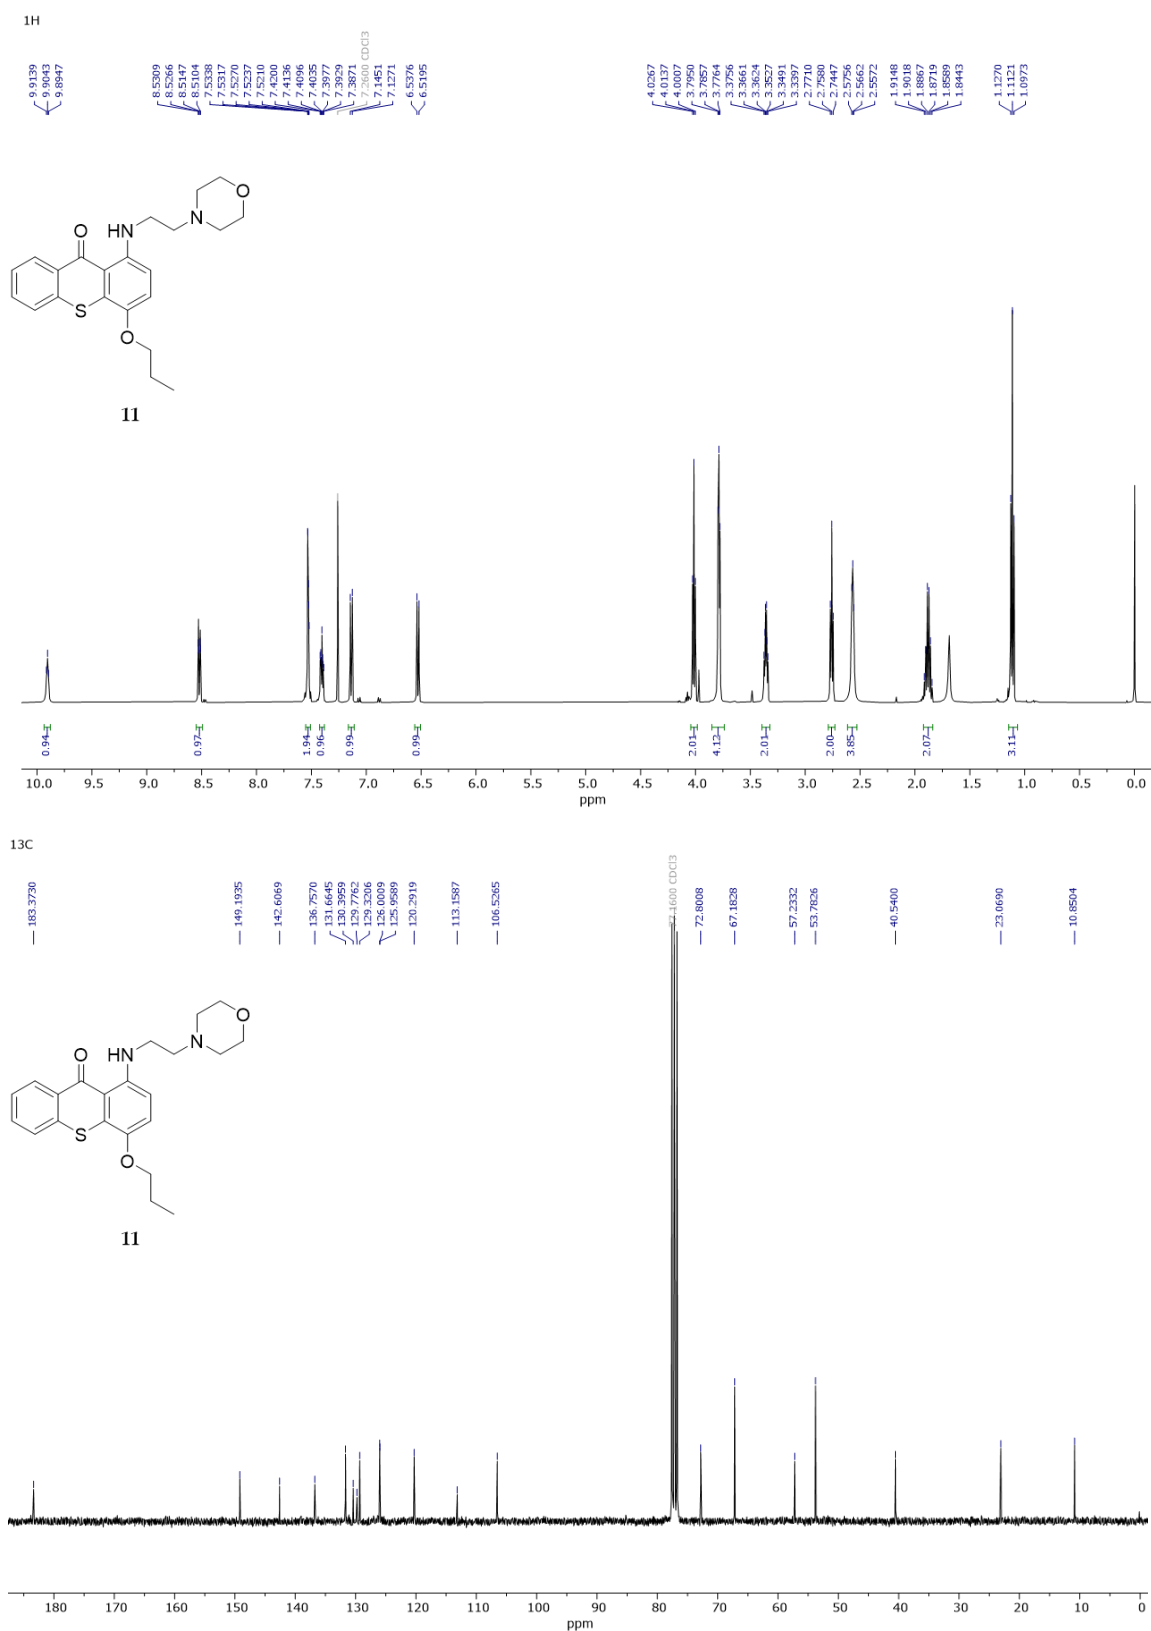

**Figure S18.** <sup>1</sup>H NMR (top, 500.13 MHz, CDCl<sub>3</sub>) and <sup>13</sup>C NMR (bottom, 75.48 MHz, CDCl<sub>3</sub>) for compound **11**.

TX2-4A #3-5 RT: 0.07-0.12 AV: 3 NL: 2.61E8  
F: FTMS + p ESI Full ms [50.00-2000.00]

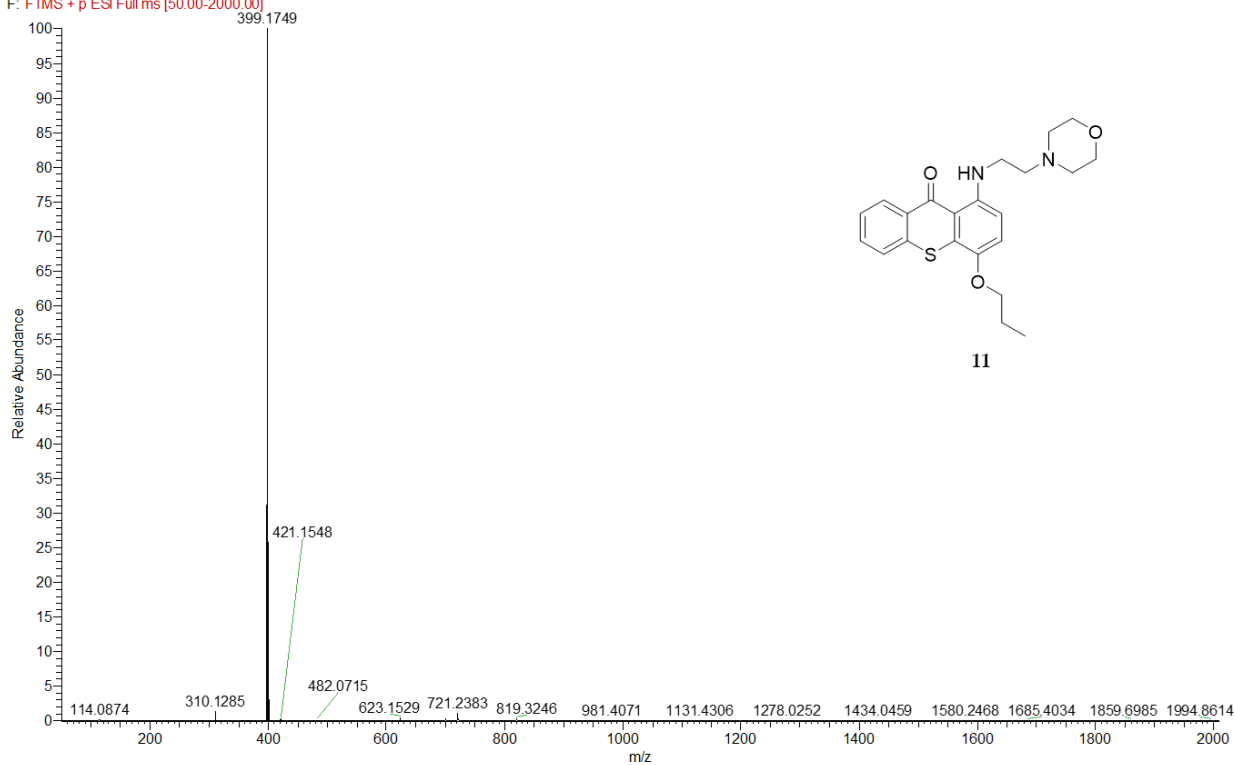

| Meas. m/z | Formula                                                         | m/z      | err [ppm] |
|-----------|-----------------------------------------------------------------|----------|-----------|
| 399.1749  | C <sub>22</sub> H <sub>27</sub> N <sub>2</sub> O <sub>3</sub> S | 399.1742 | 1.75      |

Figure S19. Electrospray ESI data for compound 11.

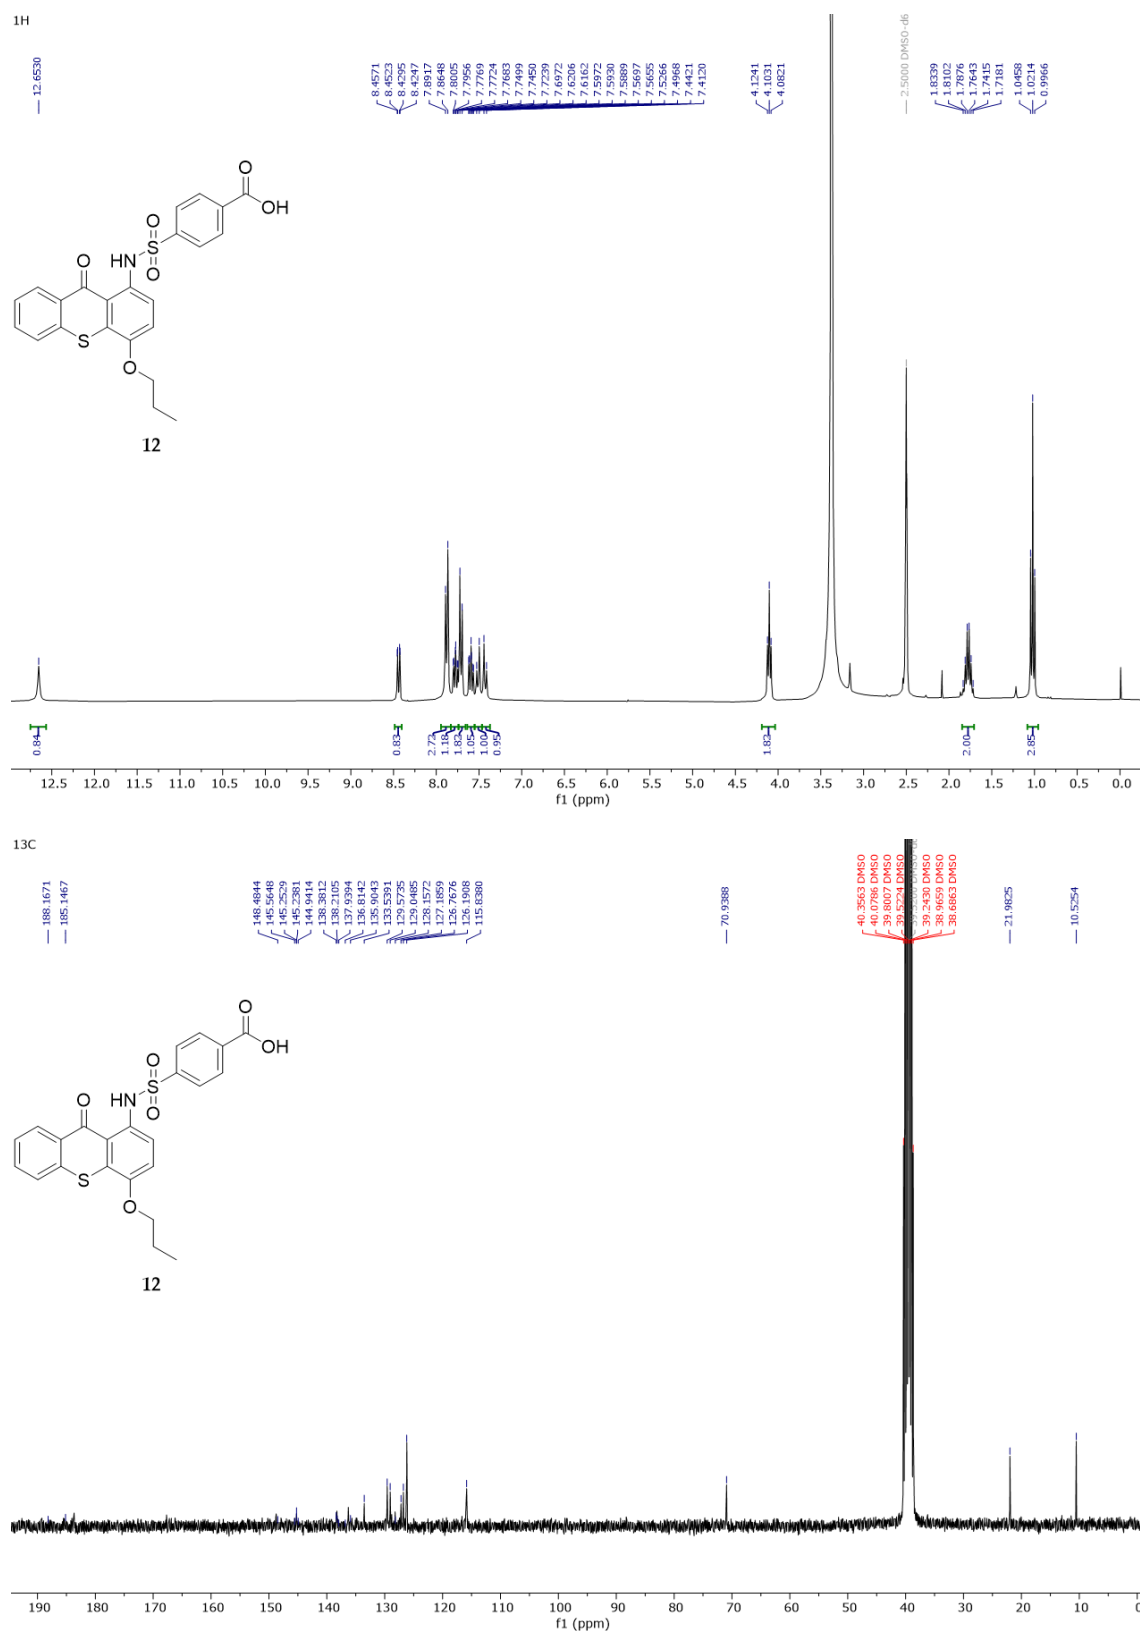

**Figure S20.** <sup>1</sup>H NMR (top, 300.13 MHz, DMSO) and <sup>13</sup>C NMR (bottom, 75.48 MHz, DMSO) for compound **12**.



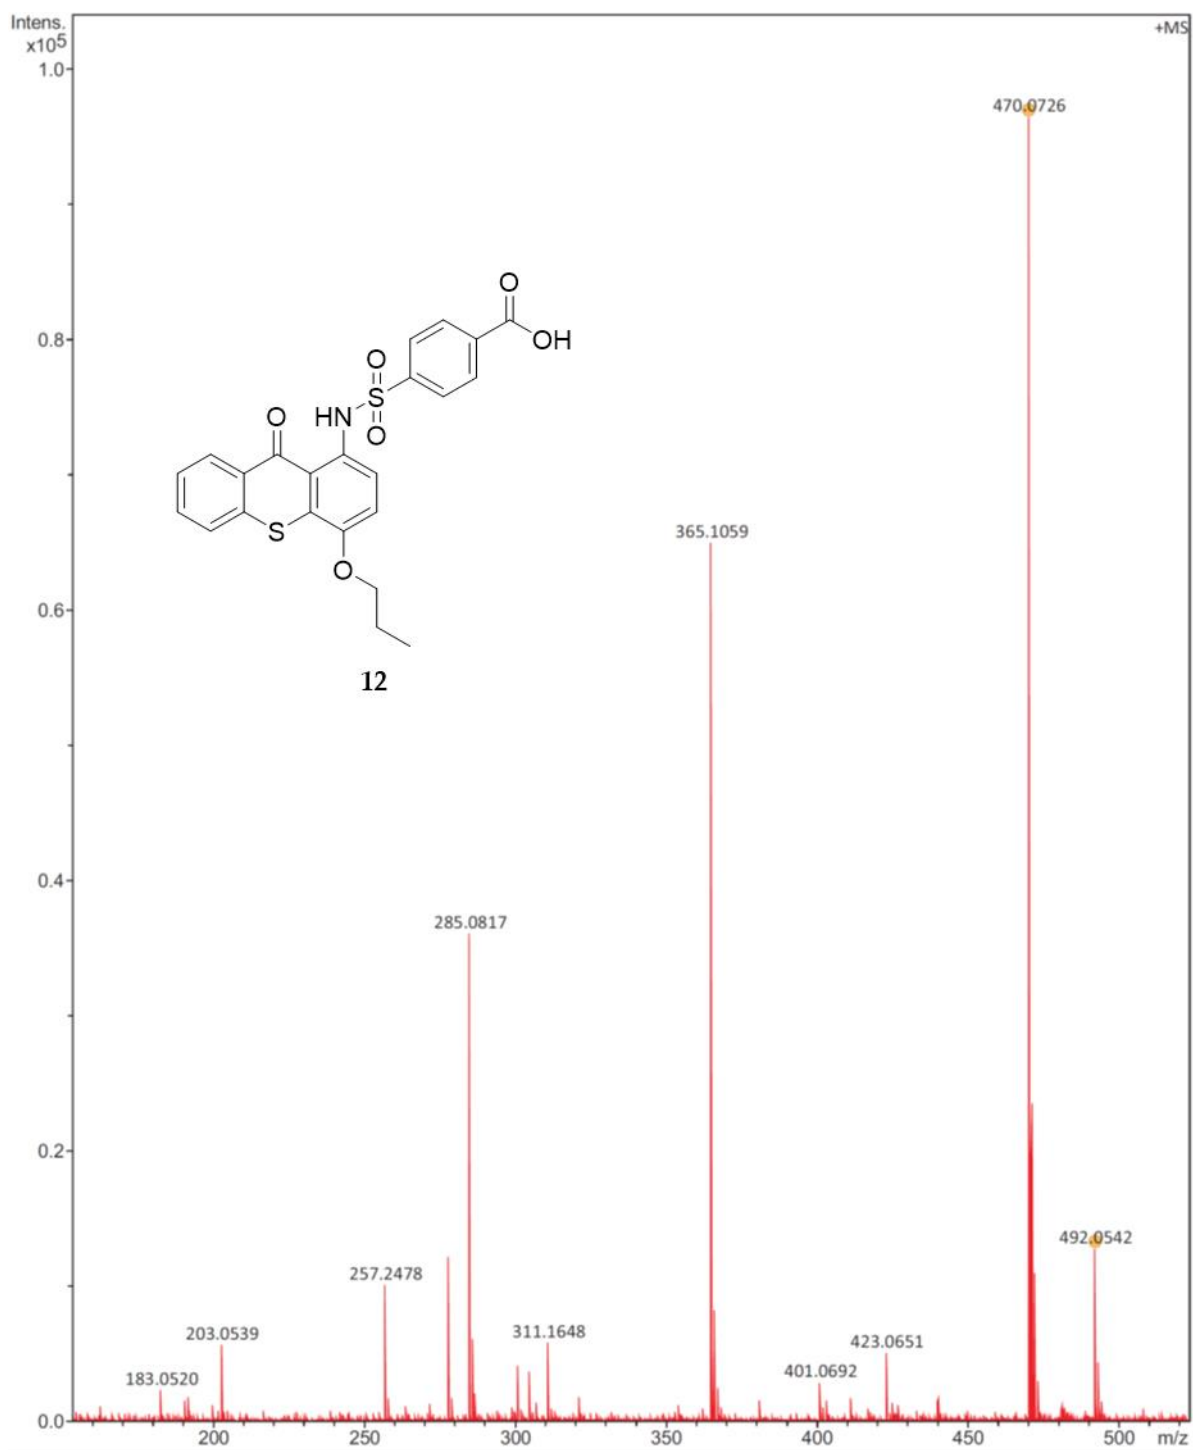

| Meas. m/z | Formula                                                        | m/z      | err [ppm] |
|-----------|----------------------------------------------------------------|----------|-----------|
| 470.0726  | C <sub>23</sub> H <sub>20</sub> NO <sub>6</sub> S <sub>2</sub> | 470.0732 | -1.06     |

Figure S21. Electrospray ESI data for compound 12.

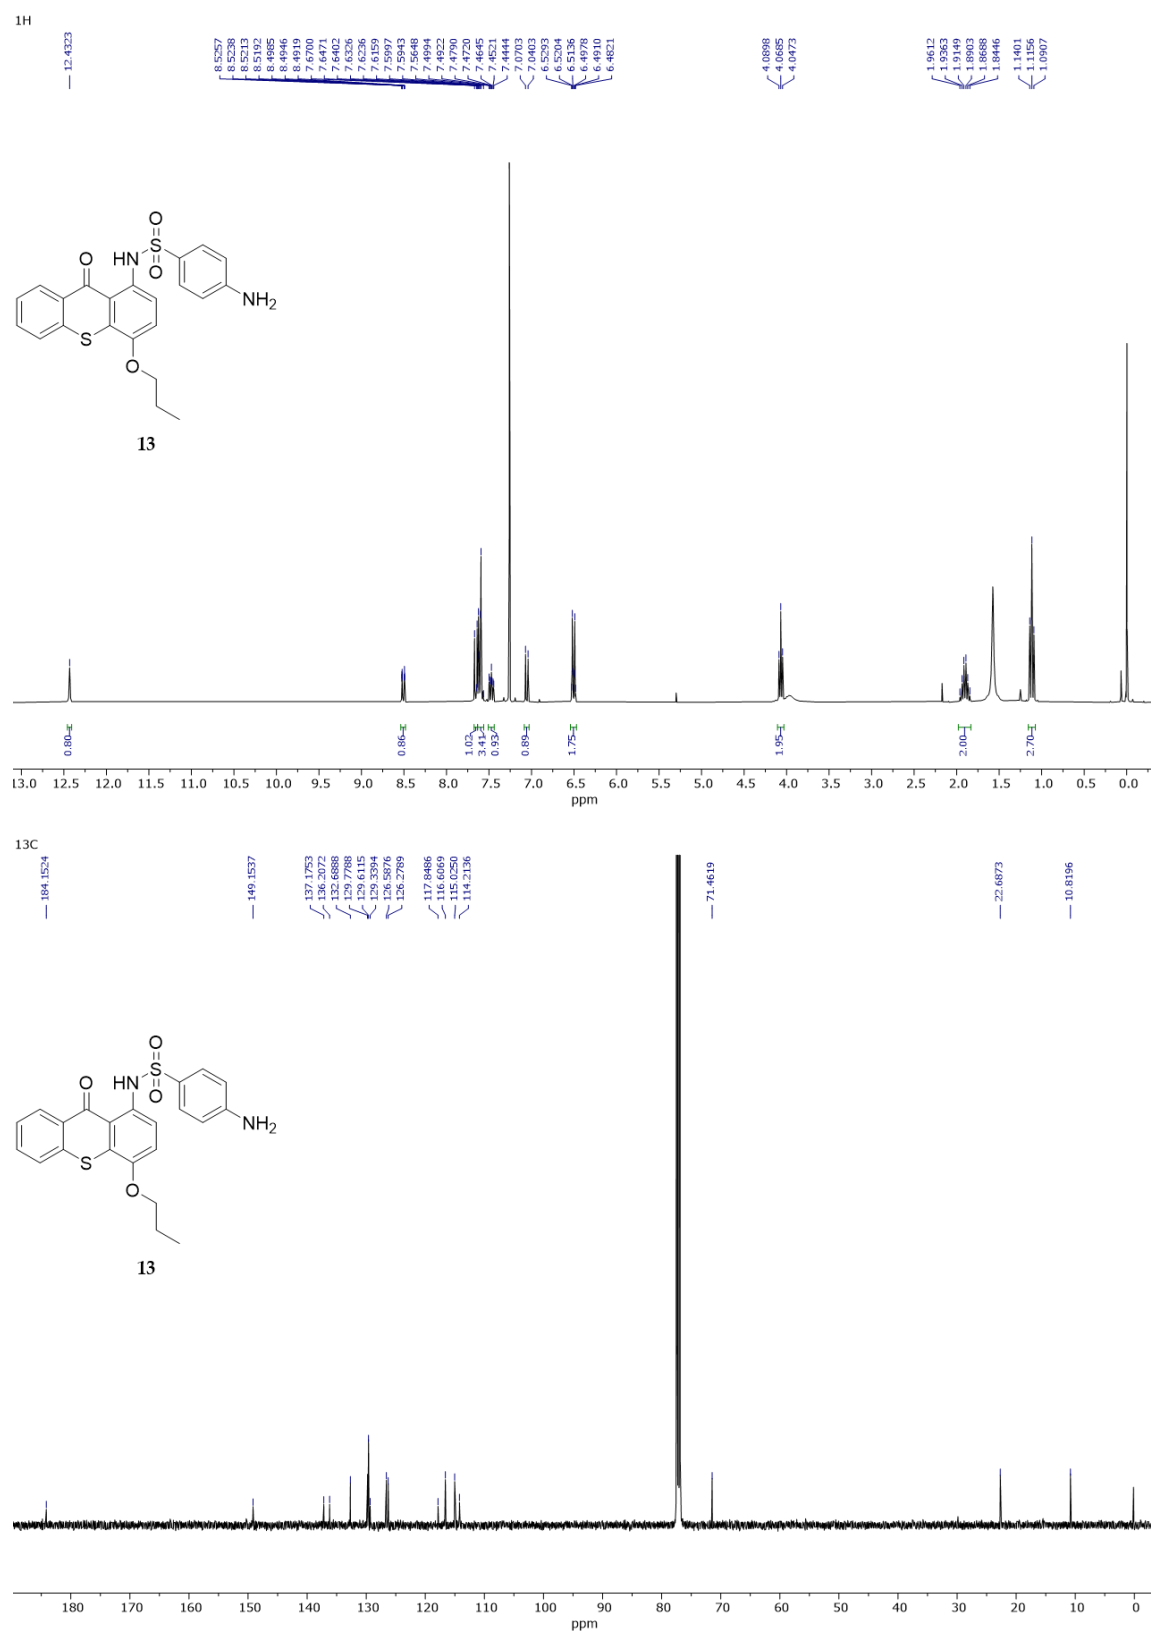

**Figure S22.** <sup>1</sup>H NMR (top, 300.13 MHz, CDCl<sub>3</sub>) and <sup>13</sup>C NMR (bottom, 75.48 MHz, CDCl<sub>3</sub>) for compound **13**.

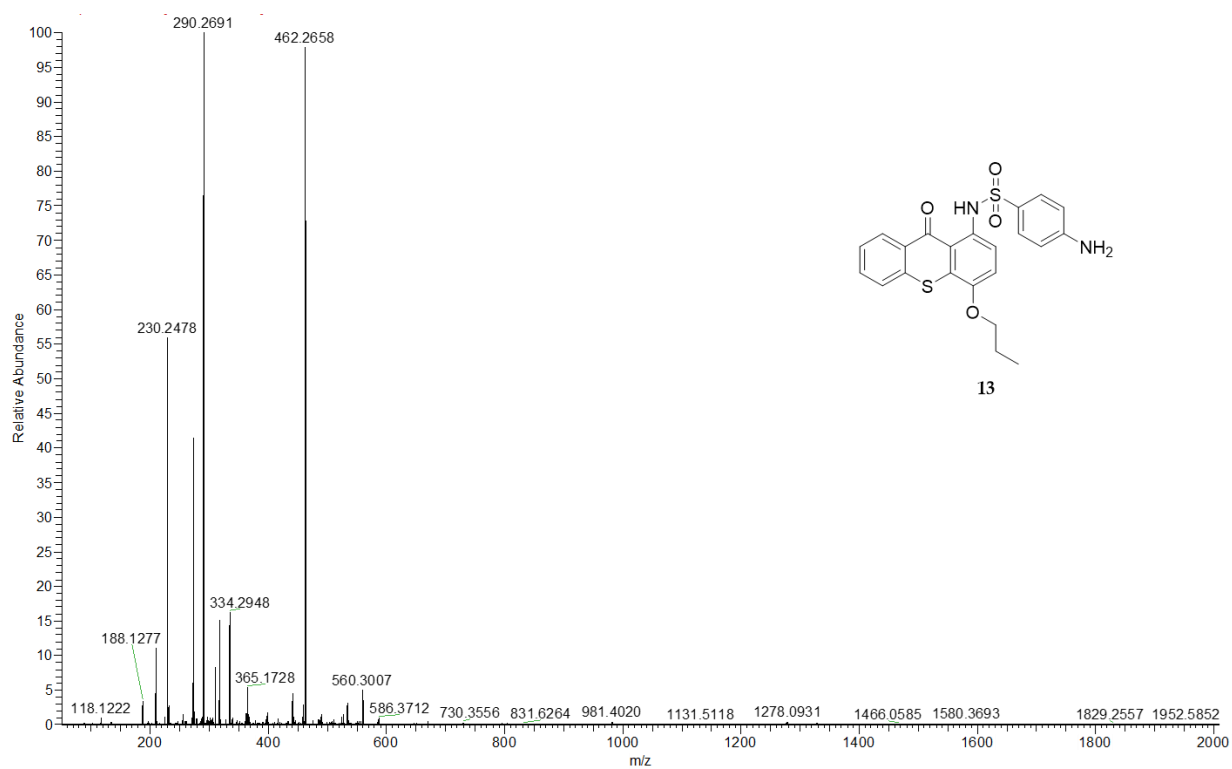

| Meas. m/z | Formula                                                           | m/z      | err [ppm] |
|-----------|-------------------------------------------------------------------|----------|-----------|
| 462.2658  | C <sub>23</sub> H <sub>19</sub> NO <sub>6</sub> S <sub>2</sub> Na | 462.0683 | 427.43    |

Figure S23. Electrospray ESI data for compound 13.

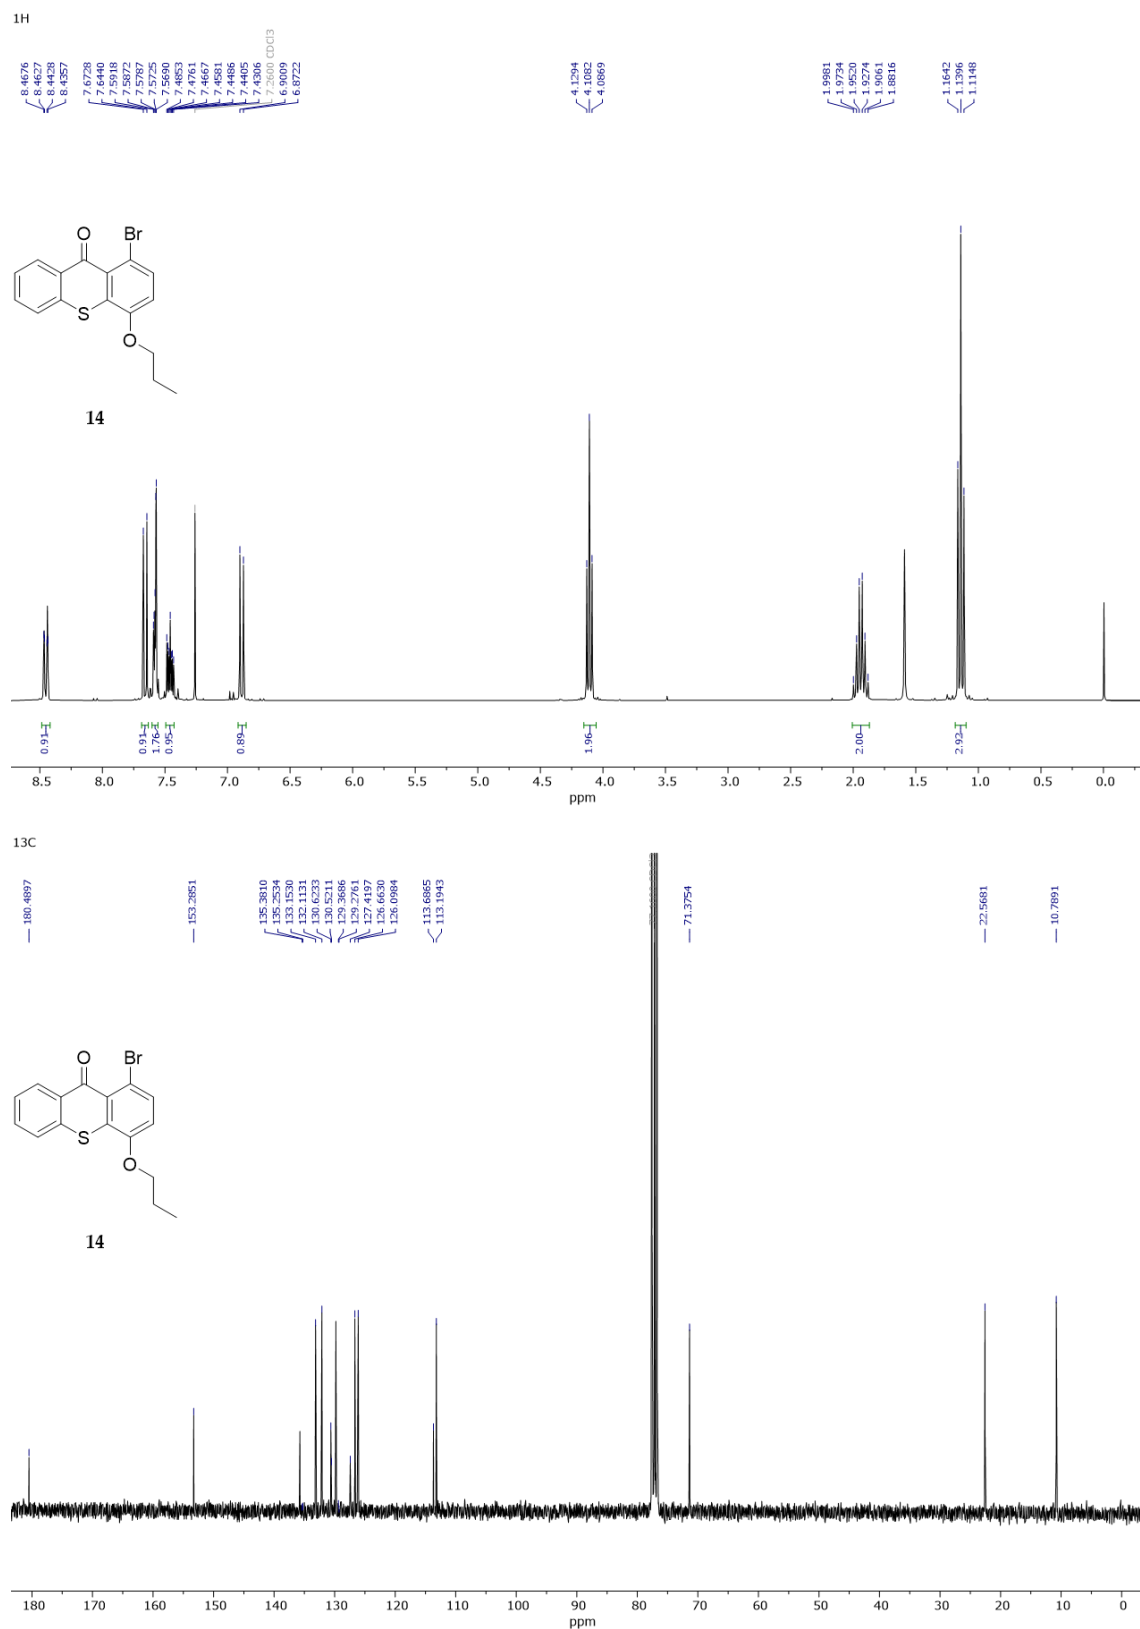

**Figure S24.** <sup>1</sup>H NMR (top, 300.13 MHz, CDCl<sub>3</sub>) and <sup>13</sup>C NMR (bottom, 75.48 MHz, CDCl<sub>3</sub>) for compound **14**.

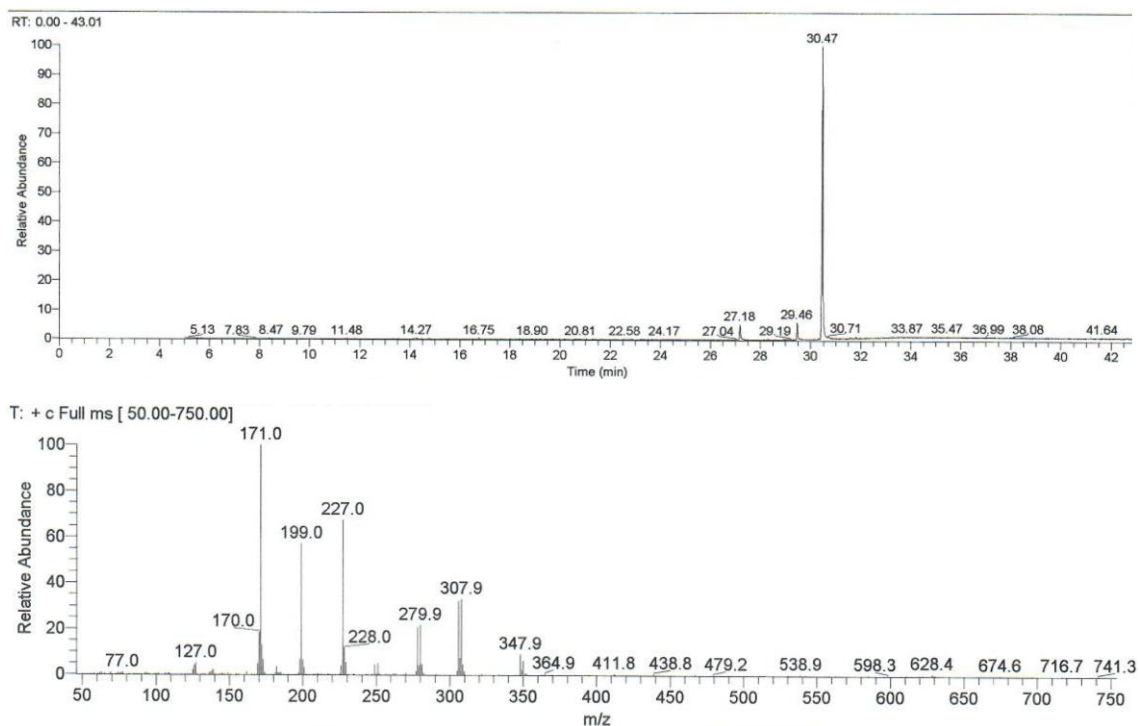

Figure S25. GC-MS spectra of compound 14.

**Table S1.** Cytotoxicity of the selected compounds in NIH/3T3 cell line.

| Compound    | IC <sub>50</sub> (μM) ± SD |
|-------------|----------------------------|
| 3           | >100                       |
| 8           | >100                       |
| 12          | 64.47 ± 4.54               |
| 13          | >100                       |
| 17          | >100                       |
| Doxorubicin | 12.05 ± 0.81               |
